# Supplementary material for: Global Conformational Dynamics of a Y-Family DNA Polymerase during Catalysis
Source: PLoS Biol. 2009 Oct 27;7(10):e1000225. doi: 10.1371/journal.pbio.1000225 (PMC2758995; doi:10.1371/journal.pbio.1000225)
Supplement: Table S4 — The phase rates (s−1) derived from stopped-flow kinetic assays are the average from multiple independent experiments and are reported as mean ± standard deviation. (0.08 MB DOC) [file pbio.1000225.s010.doc]

| **Table S4.** The phase rates (s-1) derived from stopped-flow kinetic assays are the average from multiple independent experiments and are reported as mean ± standard deviation. | | | | | | | | | |
| --- | --- | --- | --- | --- | --- | --- | --- | --- | --- |
| **Domain**  **Mutant**  **(location)** | **DNA** | **Phase Rate** (s-1) | | | | | | | |
| **Donor** | | | | **Acceptor** | | | |
| **P1** | | **P2** | | **P1** | | **P2** | |
| **20 C** | **37 C** | **20 C** | **37 C** | **20 C** | **37 C** | **20 C** | **37 C** |
| Finger  N70Ca  (loop) | S-1 | 142 | 335 | 0.530.06 | 2.60.6 | 133 | 272 | 0.450.09 | 2.60.1 |
| S-2 | 157 | 255 |  |  | 227 | 235 |  |  |
| Finger  E49Ca  (helix) | S-1 | 192 | 365 | 0.780.09 | 3.70.6 | 216 | 375 | 0.810.08 | 3.80.7 |
| S-2 | 182 | 331 |  |  | 215 | 342 |  |  |
| Palm  S96Ca (loop) | S-1 | 161 | 221 | 0.550.09 | 3.00.6 | 192 | 265 | 0.530.08 | 3.10.5 |
| S-2 | 183 | 282 |  |  | 142 | 232 |  |  |
| Palm  S112Ca  (loop) | S-1 | 121 | 212 | 0.620.01 | 3.20.3 | 132 | 201 | 0.610.03 | 3.10.4 |
| S-2 | 111 | 254 |  |  | 122 | 233 |  |  |
| Palm  N130Ca  (helix) | S-1 | 16±5 | 243 | 0.65±0.09 | 62 | 135 | 221 | 0.730.05 | 63 |
| S-2 | 153 | 264 |  |  | 143 | 289 |  |  |
| Thumb  S207Ca (loop) | S-1 | 142 | 352 | 0.520.08 | 41 | 132 | 326 | 0.520.09 | 3.90.5 |
| S-2 | 155 | 303 |  |  | 121 | 282 |  |  |
| Thumb  K172Ca  (helix) | S-1 | 112 | 223 | 0.510.03 | 3.20.3 | 122 | 232 | 0.440.02 | 3.40.2 |
| S-2 | 131 | 236 |  |  | 142 | 246 |  |  |
| LF  K329Ca  (loop) | S-1 | 151 | 336 | 0.510.08 | 5.30.6 | 183 | 306 | 0.480.03 | 61 |
| S-2 | 175 | 286 |  |  | 185 | 257 |  |  |
| LF  R267Ca  (helix) | S-1 | 142 | 336 | 0.50.1 | 4.10.5 | 132 | 353 | 0.440.01 | 4.00.1 |
| S-2 | 184 | 377 |  |  | 185 | 344 |  |  |
| LF/Finger  N70Cb | S-3 |  |  |  |  | 256 |  | 0.520.02 |  |
| S-4 |  |  |  |  | 247 |  |  |  |
| LF/Finger  K26Cb | S-3 |  |  |  |  | 182 |  | 0.440.09 |  |
| S-4 |  |  |  |  | 151 |  |  |  |
| aEach of the Alexa594-labelled mutants contains the C31S mutation and is listed in Table S1.  bEach of the CPM-labelled mutants contains the C31S and Y274W mutations and is listed in Table S2. The rates derived from CPM-labelled mutants are not included in the calculations of average P1 and P2 rates. | | | | | | | | | |
